# Supplementary material
Source: publisher figshare collection journal article supplement (https://plos.figshare.com/articles/dataset/_/1349980)
Supplement: Supplementary file [file 1]

BGA 001

Direct plating

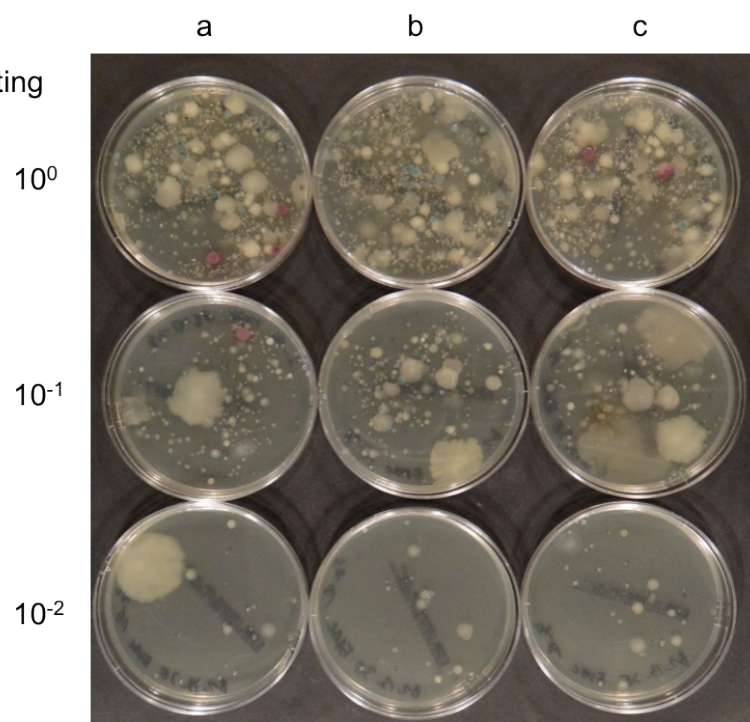

Pre enrichment

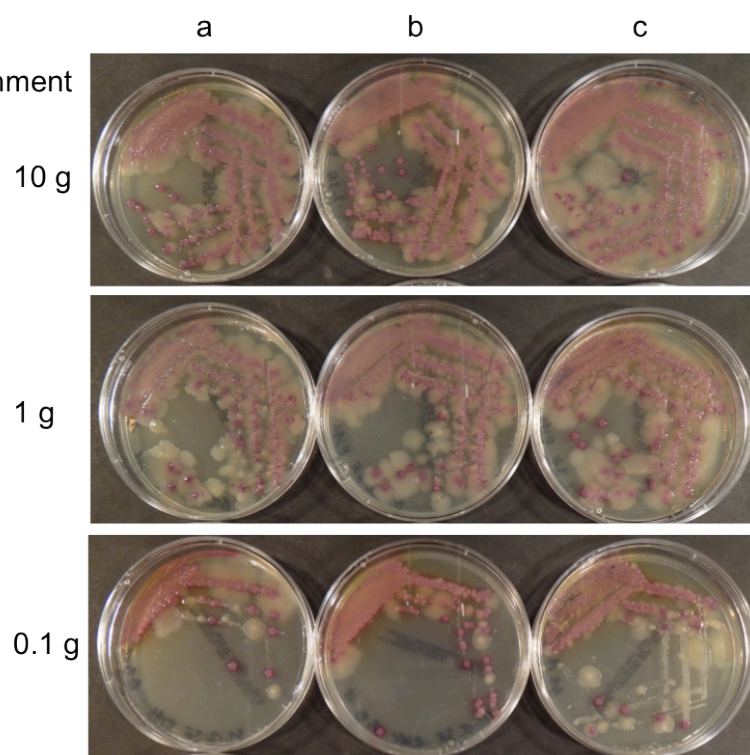

BGA 015

Direct plating

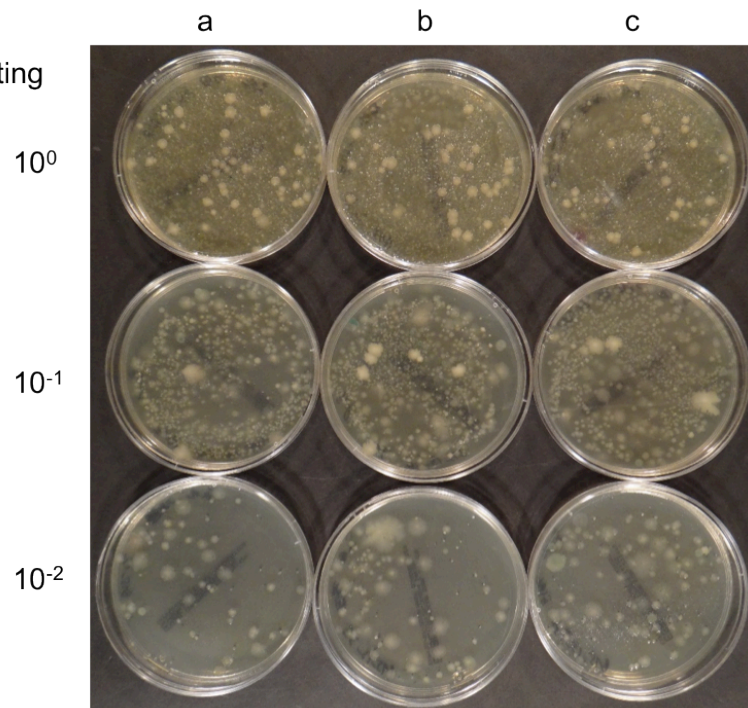

Pre enrichment

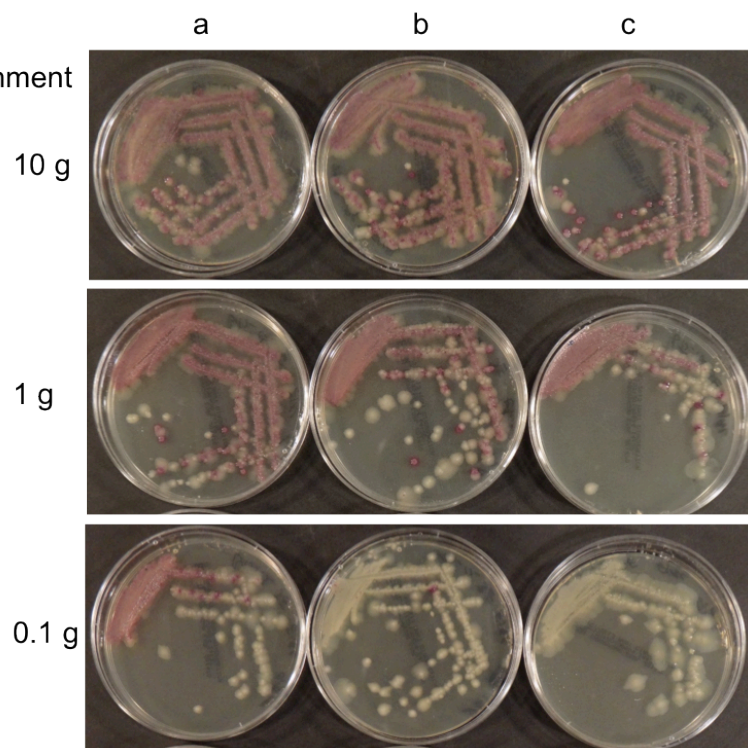

**Figure S1. Overview of growth on CHROMagar ESBL after direct plating (sample dilutions  $10^0$  to  $10^{-2}$ ) and after pre-enrichment of 0.1, 1, and 10 g.**
