# Supplementary material
Source: publisher figshare collection journal article supplement (https://plos.figshare.com/articles/dataset/_/1349980)
Supplement: Supplementary file [file 1]

| BOX Type | 2012    |         |         |         |         | 2013             |               |              |              | 2014         | 2013         |               |              |              | 2014         |
|----------|---------|---------|---------|---------|---------|------------------|---------------|--------------|--------------|--------------|--------------|---------------|--------------|--------------|--------------|
|          | BGA 001 | BGA 002 | BGA 005 | BGA 006 | BGA 012 | BGA 001 Feb.     | BGA 001 April | BGA 001 July | BGA 001 Oct. | BGA 001 Feb. | BGA 015 Feb. | BGA 015 April | BGA 015 Aug. | BGA 015 Oct. | BGA 015 Feb. |
|          | Input   | Output  | Input   | Output  | Input   | Input            | Output        | Input        | Output       | Input        | Output       | Input         | Output       | Input        | Output       |
|          | Output  | Output  | Output  | Output  | Output  | Output           | Output        | Output       | Output       | Output       | Output       | Output        | Output       | Output       | Output       |
| 1a       |         |         |         |         |         |                  |               |              |              |              | 6            |               |              |              |              |
| 1b       |         |         |         |         |         |                  |               | 9            |              |              | 8            |               | 5            |              |              |
| 1c       |         |         |         |         |         |                  |               |              |              |              | 1            |               |              |              |              |
| 1d       |         |         |         |         |         |                  |               |              |              |              |              |               | 2            | 5            |              |
| 1e       |         |         |         |         |         |                  |               |              |              | 2            |              |               |              |              |              |
| 2a       |         |         |         |         |         |                  |               | 3            |              |              | 2            |               |              |              |              |
| 2b       |         |         |         |         |         |                  |               | 2            | 1            |              |              |               |              |              |              |
| 2f       |         |         |         |         |         |                  |               |              |              |              |              |               |              |              |              |
| 2g       |         |         |         |         |         |                  |               |              | 5            |              |              |               |              |              |              |
| 2h       |         |         |         |         |         |                  |               |              | 1            |              |              |               |              |              |              |
| 3a       |         |         |         |         |         | 7                |               |              |              | 2            |              |               |              |              |              |
| 3b       |         |         |         |         |         |                  | 1             |              |              |              |              | 1             | 1            | 5            |              |
| 3c       |         |         |         |         |         |                  | 1             |              |              |              |              |               |              |              | 1            |
| 3d       |         |         |         |         |         | 2                |               |              |              |              |              | 1             |              |              |              |
| 3e       |         |         |         |         |         |                  |               |              |              |              |              |               |              |              |              |
| 3f       |         |         |         |         |         |                  |               |              |              |              |              | 2             |              |              |              |
| 3g       |         |         |         |         |         |                  |               |              | 3            |              |              |               |              |              |              |
| 4a       |         |         |         |         |         |                  |               |              |              | 1            |              |               |              |              |              |
| 4b       |         |         |         |         |         | not investigated |               |              |              |              |              |               |              |              |              |
| 4c       |         |         |         |         |         |                  |               |              |              |              |              |               |              |              |              |
| 4d       |         |         |         |         |         |                  |               |              |              |              |              |               |              |              |              |
| 5a       |         |         |         |         |         |                  |               |              |              |              |              |               |              |              |              |
| 5b       | 1       |         |         |         |         |                  |               |              |              |              |              |               |              |              |              |
| 5c       |         |         |         |         |         |                  |               |              |              |              |              |               |              |              |              |
| 5g       |         |         |         |         |         |                  |               |              |              |              |              |               |              |              |              |
| 6a       |         |         |         |         |         |                  |               | 1            |              |              |              |               |              |              |              |
| 12a      |         |         |         |         |         |                  |               |              |              |              |              |               |              |              |              |
| 12b      |         |         |         |         |         |                  |               |              |              |              |              |               |              |              |              |
| 12c      |         |         |         |         |         |                  |               |              |              |              |              |               |              |              |              |
| 12e      |         |         |         |         |         |                  |               |              |              |              |              |               |              |              |              |
| 20a      | 1       |         |         |         |         |                  |               |              |              |              |              |               |              |              |              |
| 30c      |         |         |         |         |         |                  |               |              |              |              |              |               |              |              |              |
| 30e      |         |         |         |         |         |                  |               |              | 3            |              |              |               |              |              |              |
| 30f      |         |         |         |         |         |                  |               |              | 1            |              |              |               |              |              |              |
| 30h      |         |         |         |         |         |                  |               |              |              |              |              |               |              |              |              |
| 30i      |         |         |         |         |         |                  |               |              |              | 5            |              |               |              |              |              |
| 30j      |         |         |         |         |         |                  |               |              |              | 1            |              |               |              |              |              |
| 30k      |         |         |         |         |         |                  |               |              |              | 1            |              |               |              |              |              |
| 32b      |         |         |         |         |         |                  |               |              | 2            |              |              |               |              |              |              |
| 60a      |         |         |         |         |         |                  |               | 1            |              |              |              |               |              |              |              |
| 60b      |         |         |         |         |         |                  |               |              |              | 4            |              |               |              |              |              |

**Figure S2. Distribution of *E. coli* genotypes (defined by BOX-PCR pattern) in input and output samples of the investigated biogas plants.** Grey boxes indicated the presences of a specific genotype. Numbers in Boxes represent the number of individual isolates which were analyzed.
