# Supplementary material
Source: publisher figshare collection journal article supplement (https://plos.figshare.com/articles/dataset/_/1349980)
Supplement: Supplementary file [file 1]

**Table S1 Overview of the composition of input samples and bioenergy crops from the different biogas plants investigated in 2012 (A) and 2013 (B)**

**A**

| <b>Biogas plant</b> | <b>Input sample composition (in percent)</b>                                                    | <b>Supplemented bioenergy crops (t per day)</b>            |
|---------------------|-------------------------------------------------------------------------------------------------|------------------------------------------------------------|
| BGA 001             | 75% slurry (3:1 fattening pig to dairy cattle)<br>25% manure (6:0.5 cattle to laying hens)      | 7 corn<br>1.2 forage rye                                   |
| BGA 002             | 50% slurry (3:1 fattening pig to dairy cattle)<br>50% manure (1:1:2 horse to chicken to cattle) | 8 corn<br>8 forage rye                                     |
| BGA 005             | 73% dairy cattle slurry<br>27% manure (2:1 cattle to fattening chicken)                         | 9 corn<br>0.6 grass silage                                 |
| BGA 006             | 83% slurry (1:1 dairy cattle to breeding sow)<br>17% dairy cattle manure                        | 9.3 corn<br>0.3 grass silage<br>6 rye silage<br>0.5 barley |
| BGA 012             | 100% chicken manure                                                                             | 25.5 corn                                                  |

**B**

|         | <b>Time point</b> | <b>Input sample composition (in percent)</b>                          | <b>Supplemented bioenergy crops (t per day)</b> |
|---------|-------------------|-----------------------------------------------------------------------|-------------------------------------------------|
| BGA 001 | February          | 43% slurry (cattle)<br>57% manure (5:1 cattle to chicken)             | 7.5 corn<br>1.5 forage rye                      |
|         | April             | 49% slurry (3:1 pig to cattle)<br>51% manure (5:1 cattle to chicken)  | 6.5 corn<br>1.5 forage rye                      |
|         | July              | 46% slurry (pig)<br>54% manure (6:1 cattle to chicken)                | 6 corn<br>2 forage rye                          |
|         | October           | 54% slurry (20:1 cattle to pig)<br>55% manure (6:1 cattle to chicken) | 7 corn<br>2 grass silage                        |
| BGA 015 | February          | 70% slurry (cattle)<br>30% manure (2.5:1 chicken to horse)            | 6.5 corn<br>1 grass silage                      |
|         | April             | 60% slurry (cattle)<br>40% manure (3:1 chicken to horse)              | 5.5 corn<br>0.5 grass silage                    |
|         | August            | 76% slurry (cattle)<br>24% manure (4:1 chicken to horse)              | 2 corn<br>6 rye silage<br>1 crushed corn        |
|         | October           | 71% slurry (cattle)<br>29% manure (4:1 chicken to horse)              | 6 corn<br>3 grass silage<br>1 crushed corn      |
