# Supplementary material
Source: publisher figshare collection journal article supplement (https://plos.figshare.com/articles/dataset/_/1349980)
Supplement: Supplementary file [file 1]

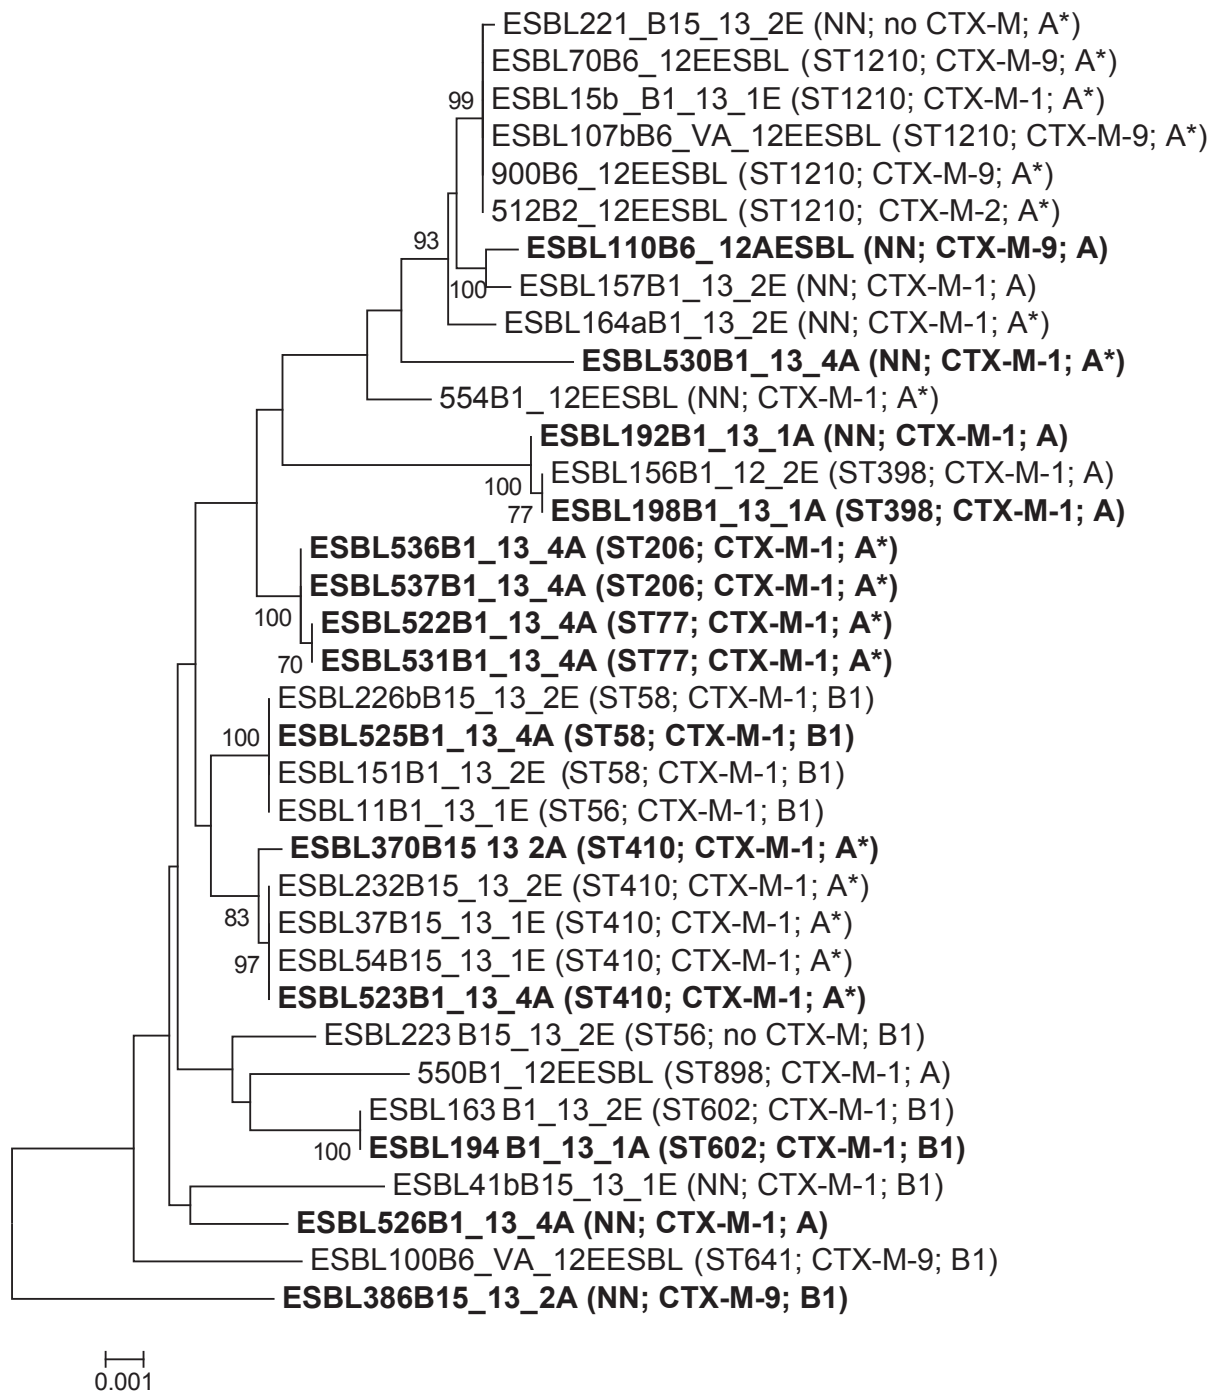

**Figure S4. Multilocus sequence based maximum-likelihood tree based on concatenated nucleotide sequences showing the phylogenetic variety of *E. coli* isolates.** All isolated from output samples are marked in bolt. Sequence types, CTX-M-groups and phylogenetic *E. coli* assignments are given in brackets. ST types were determined using the *E. coli* MLST database (<http://mlst.warwick.ac.uk/mlst/dbs/Ecoli>). Bar: 0.001 Nucleotide substitutions per sequence positions.
